# Supplementary material for: TrpML-mediated astrocyte microdomain Ca2+ transients regulate astrocyte–tracheal interactions
Source: eLife. 2020 Dec 7;9:e58952. doi: 10.7554/eLife.58952 (PMC7721441; doi:10.7554/eLife.58952)
Supplement: Figure 1—source data 1. [file elife-58952-fig1-data1.xlsx]

## Sheet: Sheet1
Figure 1-Source Data 1. Characterization of microdomain Ca2+ transients in Drosophila astrocytes.
Figure 1C				Figure 1D								Figure 1E
	occurence	percentage (%)			sample No.	control	tetrodotoxin	0mM ExtraCa2+	LaCl3				sample No.	myr-GCaMP5a	myr-R-GECO1
	1	28.4							0.1mM	1mM			1	14.8	6.3
	2	35.2			1	13	20.7	0.3	3.3	0.3			2	8.5	8.3
	3	20.4			2	8.7	5.7	0.5	9.5	0			3	12	13.3
	4	5.6			3	11.8	7.8	0	13.7	0.2
	5	5.6			4	19.7	9.8	0.5	6.7	0.2
	6	2.5			5	12	11.3	0.3	4.8	0
	7	0.6			6	14.8	11.5	0	8.2	4.2
	8	0.6
	9	0.6
	10	0
	11	0
	12	0.6
