# Supplementary material for: TrpML-mediated astrocyte microdomain Ca2+ transients regulate astrocyte–tracheal interactions
Source: eLife. 2020 Dec 7;9:e58952. doi: 10.7554/eLife.58952 (PMC7721441; doi:10.7554/eLife.58952)
Supplement: Figure 2—source data 1. [file elife-58952-fig2-data1.xlsx]

## Sheet: Sheet1
Appendix Figure 2-Source Data 5. Astrocyte microdomain Ca2+ transients require TrpML.
Appendix 2 - Figure 2A					Appendix 2 - Figure 2B	control	trpml1	alrm>trpml-myc; trpml1		Appendix 2 - Figure 2C	control	trpml1		Appendix 2 - Figure 2E		Eclosion rate (%, normalized)
	sample No.	control	trpml1		dF/F0, %	6.7	7	9.8		dF/F0, %	7.2	1.1			replicates	trpml1	alrm>trpml-myc; trpml1/trpml1
	1	9.3	2.3			5.6	5.8	9.2			9.2	0.9			1	0	90.9
	2	8	2			6.4	7	9.4			13.2	0.5			2	0	78.6
	3	17.3	1.3			5.6	8.1	9.4			25.7	7.6			3	0	119
	4	7.3	1.3			6.8	7.1	13.6			11.5	15.3
	5	18.3	3			5.4	6.3	9.6			25.9	23
	6	11	1			6	7.4	11.3			12.6	35.7
						6.3	7.6	10.2			16.2	36
						8	7.6	8.8			25.1	13.3
						7.1	6.7	9.6			29.1	21.3
						6.3	8.5	8.8			15.4	35.7
						7.1	7.9	9.1			37.5	28.3
						7.1	7.2	9.6			23.8	47.4
						8.9	7.6	9.8			11.1	10.9
						7.2	6.4	9.8			18.7	41
						6	10.2	10.5			11.8	5.6
						6	8.2	10.4			21.4	6.3
						9.2	6.9	9.9			49.8	2.2
						7.2	6.5	12.9			27.6	0.9
						5.9	8	9.8			20.6	3.5
						8.4	8	10.5			5.6	1.7
						9.8	7.8	15.9			3.1	1.5
						7	7	8.3			6.6	4.5
						6.3	7.3	12.3			14.4	10.5
						7.1	5.5	10.9			9.8	2.1
						9.1	6	10.1			2.2	19.3
						6.6	6.7	10.2			13.6	8.7
						7.7	11.7	12.6			4.7	36.2
						6.8	5.2	18			2.5	28.5
						5.9	9.4	11.3			1.4	19.8
						11.3	7.2	11.5			5.4	4.7
						9.6	6.7	8.9			4	9.9
						8.3	6.1	14.3			2.6	9
						7.3	8.8	11.4			7.1	10.9
						8	10.9	10.9			10	11.5
						8.6	7.7	10.6			4.7	26.8
						9.8	6.1	9.6			3.2	27.7
						8.9	7.7	10.1			11	22.8
						7.7	7.5	11.4			9.1	12.8
						10.6	10.3	12.5			26.4	8
						7.3	5.9	12.1			22.4	2.4
						9.6	4.9	13.8			45	9.2
						11	6.3	18.1			21	12.9
						8.5	10.3	10.1			14.6	12.7
						8.8	6.7	14.3			22.8	15.1
						6.6	9.6	11.8			26.9	6
						7.1	9.6	8.9			12.7	4.6
						6.1	11.9	14.2			20	15.1
						6.9	6.7	13.1			23.5	18.3
						8.8	7.9	10			20	18.6
						6.5	11.2	15.4			41.7	12.8
						7.2	7.2	10.7			3.7	15.5
						6.8	14.8	11.1			4	13.6
						7	10.4	15			4.6	8.5
						8	7.3	17.7			7	17.7
						10.3	7.1	17.4			5.2	15.2
						6.7	8.1	63.2			9.4	11.3
						6.3	8.4	7.1			13.5	17.8
						6	8.8	12			18.2	2.1
						10.4	6.7	6			20.7	15.3
						7.2	7.6	6.6			9.9	8.8
						6.9	6	6.4			12	22.9
						7.4	10.2	5.9			11.3	15.6
						6.8	8.8	7.2			10.2	22.3
						7.2	7.3	8.2			11.8	25
						8.1	13.6	5.6			11.9	21.2
						7.5	7.2	9.8			37.2	31.4
						8.1	8.2	7.8			14.7	28.6
						7	4.8	10.9			25.2	10.6
						7	7.8	11.2			8.8	27.7
						8.1	7.3	7.5			17.8
						7.5	8.2	7.1			32.2
						7.5	8.5	6.6			20.3
						7.7	9.3	7.6
						6.9	5.8	8.7
						10.1	5.2	8.1
						6.4	6.3	14.2
						8.8	8.8	7.2
						7.1	7.2	10
						6	8.1	6.3
						8.6	7	9.1
						9.2	8.2	7.7
						11	6.7	7.7
						8.2	7.1	11.7
						6.7	6.3	7
						9.6	6.7	17.1
						9.8	5.5	9.3
						9.3	8.9	9.1
						7.6	8	7.8
						7.8	9.4	7.8
						9.1	8	7.5
						8.2	6.5	8.8
						9.4	10	7.8
						9	9.6	8.7
						6.6	7.1	6.9
						6.9	6.4	60
						7.6	5.6	11.6
						8.8	8.4	6.1
						7.5	7	6.1
						9	8.1	8.4
						7.4	7.7	6.8
						9.6	7.2	7
						9.4	6.6	6.3
						6.3	8.9	8.4
						7.4	7.5	6.2
						10.8	6.7	8.5
						9.9	8.9	6.3
						9.7	7.2	9.8
						9.3	8	8.5
						10.1	7.8	6.5
						8.3	7.8	6.8
						7.2	8.1	7.5
						42	6.3	7.5
						7.2	8.5	6.7
						7.8	6.9	7
						6.4	6.7	5.9
						11.2	6.3	8
						5.5	7.2	7.7
						15.2	8.4	7.7
						5.9	8.3	8.6
						6.7	6.9	7.9
						10.1	7.1	7.4
						6	7.1	10.3
						8	11.3	7.8
						6.1	7.1	8.4
						6	9.4	9.6
						7.6	8.5	11.5
						5.9	7.5	10.2
						7.6	5.8	7.6
						6.2	8	7.8
						11.9	7.6	7.3
						9.2	10.6	8
						6.8	8.9	6.9
						8.4	7.7	7.1
						8.2	6.3	10.3
						6.9	8	8
						7.3	7.3	5.7
						7.3	5.8	6.5
						10.7	8.8	6
						8.5	6.9	7.2
						8.3	8.7	7.1
						9.6	8.3	6.8
						7.8	7.8	7.5
						7.2	6	6.4
						7.5	140.4	7.2
						8.3	6.9	6.9
						9.3	9.5	5.9
						7.4	7.9	7.3
						7.5	7.6	6.2
						6.9	8.1	6.2
						11	5.9	8.6
						8.1	9.4	6.8
						6.6	7.9	7.8
						6.6	8.8	8.7
						9.2	10.8	7.1
						7.8	9.1	7.4
						7.9	6.8	9.3
						12.5	7.4	8.1
						9.4	7.8	9.7
						8.9	10.9	7.1
						10.4	13.2	7.2
						8.2	7.8	8.3
						12.8		7.9
						15.4		7.4
						8.3		8.1
						7.6		8
						7.6		6.6
						7.8		6.5
						8.6		8.7
						10.4		7.1
						11.2		6.6
						10.2		7.6
						7.7		19.9
						10.2		8.1
						6.8		8.5
						9.8		7.4
						9		8.6
						8.2		9.6
						9.1		7.7
						7.1		7.7
						9		8.6
						6.8		6.7
						11.2		11.9
						7.7		8.3
						6		7.7
						8.1		7.3
						9		8.1
						7.8		8
						9.3		11.7
						8		8.8
						8.5		7.3
						7.3		7.5
						11.9		9.3
						8.2		8.6
						10.3		8.5
						9.8		8.1
						10.9		10.6
						12.3		12.5
						7.4		10.9
						6.7		7.2
						7.5		8.8
						6.9		8.5
						6.8		11.9
						8.3		7.6
						9.5		6.5
						6.1		8.9
						6.5		7
						6		7.3
						13.9		8.1
						5.9		6.6
						6.9		9.9
						5.4		7.5
						8.1		11.2
						6.4		11
						7		7.5
						6.8		10.4
						5.9		9
						7		7.3
						7.8		9.2
						6.3		7.6
						8.2		19.2
						8.9		8.5
						5.9		13.8
						8.5		7.4
						7.1		11.4
						8.2		6.4
						8.3		8.6
						7		7.7
						7.4		7.8
						10.9		9.3
						6.3		8.2
						7.5		7.2
						9.2		9
						6.4		10
						7.9		8.4
						5.5		7.8
						6.9		7.8
						11.3		6.7
						6.6		10.9
						7.2		8.6
						11		8.5
						6.6		9.6
						8.2		16.1
						6.6		11
						6.6		7.2
						7		9.6
						8.5		8.2
						6.4		12.3
						9.1		7.4
						9.6		8.5
						6.9		8
						6.4		9.4
						13.8		7.6
						7.6		7.3
						10.1		10.9
						8.7		7.2
						7.2		9.1
						12.3		8.6
						10.6		10.3
						8.3		6.7
						7.4		8.6
						6.9		4.4
						8.3		8.4
						10.5		10.4
						5.9		11
						11.6		7.5
						10.9		7.3
						8.4		8.5
						7.1		7.9
						6.8		6.2
						7.1		7.8
						6.7		5.9
						10.6		7.6
						8.3		7.1
						6.4		6.5
						6.2		8.5
						6.9		9
						6.6		7.6
						9		8.3
						7.4		8.9
						6.4		7.4
						6.2		10.7
						6.1		6.4
						6.7		8.8
						9.9		14.2
						8.3		6.5
						11.7		7.8
						8.2		8
						6		7.4
						6		8.3
						10.6		6.8
						7.3		6.7
						6.8		7.3
						10.4		6.5
						8.9		7.3
						10.3		7.9
						10.8		7.9
						8.6		12.3
						7		7.7
						8.2		8.8
						7.9		10.9
						6.5		8.5
						6.6		6.6
						8.9		8.5
						13.2		7.5
						7.4		7.6
						7.4		8
						7.7		9.9
						7.1		7.5
						8.9		7.7
						7.9		10.3
						9.1		9.2
						7		7.8
						6.6		7.4
						7.1		7.3
						9.2		12.9
						8		8.1
						6.9		9.4
						6.3		7
						5.5		6.6
						7.2		9.4
						8.1		9.2
						8.3		7.7
						7.9		12.2
						7.2		10
						9		10.4
						9		9.6
						7.3		6.4
						6.6		16.9
						7.2		8.5
						7.8		10.6
						7		10.4
						6.1		12.7
						8.2		10
						8.2		11.5
						9		9.4
						7.1		15.9
						12.2		12.3
						9.7		9.7
						8		11.6
						7.1		12.6
						9		10.1
						8.6		12
						16		11.8
						8.5		9.3
						10.8		8
						9.5		12.1
						9.2		13
						7.7		12.8
						8.2		9.8
						7		10.7
						9.5		8.9
						7.2		10.7
						8.1		10.3
						9.1		8.6
						7.6		9.3
						12.1		13.4
						7.7		12.6
						7.3		9.3
						7.9		9.5
						7		14.5
						9.3		12.1
						10.7		9.4
						9.2		8.5
						6.4		14.1
						7.8		10.7
						8		11.4
						8.2		12.4
						6.8		13.1
						8		8.9
						7		9.5
						7.5		10.3
						8.4		13.2
						6.5		11.4
						6		13.6
						7.9		8.8
						8		11.5
						9.9
						8.1
						7.1
						8.5
						8.1
						8.1
						11.8
						11.8
						8.3
						8.6
						9.4
						9.1
						7.6
						10.9
						11.3
						7.8
						8.5
						8.9
						5.9
						8.1
						10.8
						6.7
						9.4
						7.3
						7.7
						7.9
						7.2
						8.2
						9.1
						9.1
						8.2
						6.6
						10.7
						8.2
						6.3
						7
						5.3
						7.3
						6.3
						7
						8.8
						8.5
						7.4
						8.4
						8.2
						7.4
						8.2
						11.3
						9.5
						8.9
						6.2
						6.6
						10.4
						8.4
						9.3
						8.5
						7
						7.6
						7.3
						7.1
						9.3
						6.4
						6.4
						7.4
						9.3
						7.5
						6.8
						6.9
						6.6
						7.9
						8
						7.5
						7
						6.4
						7
						6.6
						6.9
						6.8
						7
						7.9
						6.4
						7.6
						9.6
						6.9
						6.1
						7.4
						7
						7.6
						6.8
						11.9
						14.4
						6.9
						6.7
						8.5
						9.1
						10.1
						9.6
						10.1
						8.3
						6.5
						9.4
						7.5
						6
						9.8
						8.5
						10
						12.3
						8.7
						6.7
						7.6
						11.1
						9.9
						8.9
						11.9
						8.4
						9
						9.7
						6.5
						7.1
						9.1
						9.6
						9.9
						10.2
						7.5
						11.5
						9.3
						11
						9.1
						7.4
						10.5
						18.3
						9
						12.5
						6.4
						8.2
						6.1
						7.4
						7
						6.2
						7.1
						5.8
						6.9
						8.8
						5.9
						7.1
						7.6
						6.5
						5.9
						6.9
						8.1
						8.8
						8.8
						6.9
						6.9
						7.6
						7.4
						8.6
						7.6
						7.3
						6.7
						7.7
						7.9
						7.8
						7.9
						7.9
						6.4
						6.6
						8.3
						7.8
						7.8
						7.9
						9.1
						7.8
						8.5
