# Supplementary material for: TrpML-mediated astrocyte microdomain Ca2+ transients regulate astrocyte–tracheal interactions
Source: eLife. 2020 Dec 7;9:e58952. doi: 10.7554/eLife.58952 (PMC7721441; doi:10.7554/eLife.58952)
Supplement: Figure 2—source data 2. [file elife-58952-fig2-data2.xlsx]

## Sheet: Sheet1
Figure 2-Source Data 2. Astrocyte microdomain Ca2+ transients are genetically distinct from soma transients and require TrpML.
	Figure 2A (gentypes: control)									Figure 2B (genotypes indicated)
											control		Oct-TyrRhono		alrm>TyrRJF01878			alrm>TyrRIIJF02749
	sample No.	Glu(-)	Glu(+)	ACh(-)	Ach(+)	GABA(-)	GABA(+)	Oct(-)	Oct(+)	sample No.	Tyr(-)	Tyr(+)	Tyr(-)	Tyr(+)	Tyr(-)	Tyr(+)		Tyr(-)	Tyr(+)
	1	11	13	9.7	12.7	13	16	14.7	21.3	1	24	31	15.3	28.7	10.7	25.7		18.7	20
	2	12.7	13.7	20.3	27.7	16	16	22	17.7	2	5	11.3	10.7	19.3	19	26		7.3	8.7
	3	23.7	24.3	17.7	17	19.3	15.3	21.3	18	3	24	30.3	5.3	11.3	9	9.3		11.3	21.3
	4	16.7	14.7	24.3	26.7	23.3	19.7	28.7	22.3	4	19.3	25.3	12	9	15.7	16.7		12.3	22
	5	7.7	10	20.7	15.7	6.3	4.3	16.3	18	5	12	21	10	26.7	24.7	28.7		26	19.3
	6	12	12.6	17.3	25.3	19.7	15	9	20	6	15.7	21.7	7.7	18.7	21.7	34.3		11.7	12.3
	Figure 2C
	sample No.	control	Tdc2RO54	ThnM18	Oct-TyrRhono
	1	20	11.5	11.2	17
	2	15.5	11.3	6.2	8.7
	3	10.2	7.5	13.7	17.8
	4	12.7	10.7	12	13
	5	16.3	13.7	7.2	13.5
	6	12.8	11.2	10.3	11.7
Figure 2D																		Figure 2E
	sample No.	control	trpA11	painless70	wtrwex	nan36a	nompC3/4	trp1	trpm2	trpl302	pkd21	alrm>pyxJF01242	alrm>trpJF01244	trpml1	trpml1/2	alrm>trpmlJF01239		sample No.	control	trpml1	alrm>myc-trpml; trpml1
	1	13.7	13.2	15.2	11.3	12.3	9.3	11.8	8.3	7.5	10.5	16.2	14.5	4.3	7.7	8.3		1	19.3	0.3	9
	2	12.8	14.7	15.3	12.2	21.7	15.5	18.8	8.7	17.3	16	21.5	10.3	2.5	4.7	7		2	14.7	2.7	9.7
	3	14.2	17.8	10.5	13	14.8	11.2	22.7	6.5	15.2	15.5	9.5	13.8	6	1.2	2.2		3	8.5	0.7	13
	4	5.7	15.8	10.8	12.2	13.2	15	18.5	13.2	19.8	13	17	10.7	3.5	1.2	8.8		4	26.2	9	6
	5	11	11	8.8	11.2	9.5	14.8	11.7	11.2	17.8	20	15.8	9	1.3	0.3	4.7		5	16.3	1.7	22.3
	6	19.3	16.3	9	16.3	12.5	19.5	11.8	12	22.5	13.7	21	14.5	7.5	3.8	5.2		6	6.8	1.8	8.8
Figure 2F						After subtraction: Tyr(+)-Tyr(-)
		control		trpml1			control	trpml1
	sample No.	Tyr(-)	Tyr(+)	Tyr(-)	Tyr(+)
	1	18.3	27	4.3	8.7		8.7	4.3
	2	15.3	20.7	4.3	4.7		5.3	0.3
	3	15	23.7	3	5.7		8.7	2.7
	4	5.7	15.3	4	12.3		9.7	8.3
	5	9.3	18.7	2.7	7.7		9.3	5
	6	7.3	17.7	4.7	8		10.3	3.3
Figure 2G					wildtype control
	sample No.	control	NAC	sample No.	H2O(-)	H2O(+)	H2O2(-)	H2O2(+)
	1	19.3	0	1	8.7	10.3	19.3	27.7
	2	12	0	2	15	21	12	12.3
	3	23.3	1	3	12	13.7	23.3	24
	4	13.3	0	4	11.7	9.7	13.3	17
	5	19.3	0	5	15	15.3	19.3	31.3
	6	15.7	0	6	15.3	17	15.7	23.7
Figure 2H		control		trpml1
	sample No.	H2O2(-)	H2O2(+)	H2O2(-)	H2O2(+)
	1	4.7	7.5	1.7	2
	2	6.3	8.7	4.7	3.8
	3	8.7	16.5	2.3	2.2
	4	20	36.3	6.5	3
	5	19.7	25	0.7	0.2
	6	12.5	27.5	6.2	7.2
