# Supplementary material for: TrpML-mediated astrocyte microdomain Ca2+ transients regulate astrocyte–tracheal interactions
Source: eLife. 2020 Dec 7;9:e58952. doi: 10.7554/eLife.58952 (PMC7721441; doi:10.7554/eLife.58952)
Supplement: Figure 3—source data 1. [file elife-58952-fig3-data1.xlsx]

## Sheet: Sheet1
Appendix Figure 3-Source Data 6. Distribution of microtubules and F-actin in larval CNS trachea.
Appendix 3 - Figure 3D		"0 sec" represents when movies start				"0 sec" represents when movies start
	event	bystander Ca2+ microdomain peak (sec)	filopodia retraction onset (sec)		event	bystander Ca2+ microdomain peak (sec)	filopodia extension onset (sec)
	1	260	364		1	78	52
	2	468	364		2	312	52
	3	182	364		3	364	52
	4	156	52		4	104	260
	5	494	52		5	260	260
	6	416	260		6	364	260
	7	468	260		7	0	598
	8	260	0		8	624	598
	9	234	338		9	260	104
	10	364	338		10	364	104
	11	182	494		11	0	728
	12	338	494		12	208	728
	13	416	494		13	364	728
	14	624	494		14	546	728
	15	182	390		15	390	52
	16	416	390		16	494	52
	17	494	390		17	624	416
	18	26	130		18	312	182
	19	104	130		19	182	104
	20	208	130		20	260	156
	21	286	130		21	338	26
	22	390	130		22	182	26
	23	520	130		23	234	78
	24	26	0		24	286	130
	25	260	0		25	260	52
	26	390	0		26	156	26
	27	520	0		27	156	26
	28	0	156		28	390	234
	29	286	156		29	494	416
	30	468	702		30	104	26
	31	858	702		31	156	78
	32	234	702		32	104	26
	33	130	338		33	286	78
	34	182	338		34	442	390
	35	286	338		35	312	130
	36	468	338		36	312	208
	37	520	338		37	312	104
	38	104	156		38	286	156
	39	260	156		39	78	26
	40	338	156		40	156	52
	41	416	156		41	312	156
	42	442	156		42	338	104
	43	624	156		43	546	234
	44	26	130		44	572	442
	45	312	130		45	286	78
	46	338	130		46	416	208
	47	416	130		47	286	130
	48	598	130		48	260	26
	49	702	130		49	390	312
	50	26	260		50	156	52
	51	78	260		51	494	416
	52	130	260		52	312	78
	53	416	260		53	260	364
	54	442	260		54	572	364
	55	598	260		55	494	208
	56	130	208		56	546	208
	57	312	208		57	702	208
	58	364	208		58	78	104
	59	468	208		59	260	104
	60	546	208		60	442	104
	61	130	234		61	702	104
	62	286	234		62	0	78
	63	416	234		63	104	78
	64	624	234		64	494	78
