# Supplementary material for: TrpML-mediated astrocyte microdomain Ca2+ transients regulate astrocyte–tracheal interactions
Source: eLife. 2020 Dec 7;9:e58952. doi: 10.7554/eLife.58952 (PMC7721441; doi:10.7554/eLife.58952)
Supplement: Figure 3—source data 2. [file elife-58952-fig3-data2.xlsx]

## Sheet: Sheet1
Figure 3-Source Data 3. Astrocyte microdomain Ca2+ transients are associated with tracheal branches and precede retraction onset of tracheal filopodia.
Figure 3E		"0 sec" represents when movies start			Figure 3F		"0 sec" represents when movies start
		microdomain Ca2+ peak(sec)	filopodial retraction onset(sec)				microdomain Ca2+ peak-retraction onset interval (sec)	microdomain peak-extension onset interval (sec)
	event					event	25.9	129.5
	1	312	338			1	0	77.7
	2	312	312			2	0	103.6
	3	260	260			3	51.8	25.9
	4	312	364			4	0	310.8
	5	234	234			5	0	155.4
	6	234	234			6	0	155.4
	7	52	52			7	25.9	155.4
	8	0	26			8	0	207.2
	9	338	338			9	25.9	129.5
	10	182	208			10	0	129.5
	11	234	234			11	0	155.4
	12	234	234			12	25.9	77.7
	13	286	312			13	25.9	77.7
	14	260	286			14	51.8	77.7
	15	156	208			15	25.9	77.7
	16	156	130			16	25.9	207.2
	17	26	52			17	25.9	51.8
	18	26	52			18	0	181.3
	19	390	390			19	25.9	103.6
	20	494	520			20	0	207.2
	21	52	52			21	25.9	129.5
	22	0	26			22	25.9	51.8
	23	338	364			23	25.9	103.6
	24	156	182			24	25.9	155.4
	25	0	26			25	25.9	233.1
	26	338	364			26	25.9	310.8
	27	156	182			27	25.9	129.5
	28	0	26			28	25.9	207.2
	29	0	26			29	25.9	207.2
	30	208	234			30	25.9	155.4
	31	208	234			31	25.9	233.1
	32	286	312			32	51.8	77.7
	33	104	156			33	25.9	103.6
	34	156	182			34	25.9	77.7
	35	104	130			35	25.9	233.1
	36	26	52			36	25.9
	37	234	260			37	25.9
	38	104	130			38	0
	39	286	286			39	25.9
	40	442	468			40	51.8
	41	312	364			41	77.7
	42	130	208			42	51.8
	43	312	364			43	51.8
	44	0	52			44	25.9
	45	78	104			45	25.9
	46	156	182			46	25.9
	47	312	338			47	25.9
	48	0	26			48	25.9
	49	338	364			49	25.9
	50	546	572			50	25.9
	51	572	598			51	25.9
	52	286	312			52	25.9
	53	416	442			53	25.9
	54	286	312			54	25.9
	55	260	286			55	25.9
	56	390	416			56	25.9
	57	156	182			57	51.8
	58	494	546			58	25.9
	59	26	52			59	25.9
	60	312	338			60	77.7
	61	416	494
