# Supplementary material for: TrpML-mediated astrocyte microdomain Ca2+ transients regulate astrocyte–tracheal interactions
Source: eLife. 2020 Dec 7;9:e58952. doi: 10.7554/eLife.58952 (PMC7721441; doi:10.7554/eLife.58952)
Supplement: Figure 4—source data 1. [file elife-58952-fig4-data1.xlsx]

## Sheet: Sheet1
Appendix Figure 4-Source Data 7. Tracheal branches overgrow in the larval ventral nerve cord of trpml1 mutants.
Appendix 4 - Figure 4A
Retraction	filopodia No.	control	alrm>trpmlJF01239	btl>trpmlJF01239		Extension	filopodia No.	control	alrm>trpmlJF01239	btl>trpmlJF01239		Max. length	filopodia No.	control	alrm>trpmlJF01239	btl>trpmlJF01239
	1	1.46	1.63	0.36			1	1.55	2.24	2.06			1	9.18	2.28	7.78
	2	0.84	1.96	3.61			2	3.18	3.92	5.41			2	3.29	1.96	5.41
	3	3.46	4.56	3.25			3	1.94	0.67	2.21			3	20.81	2.28	3.32
	4	2.54	2.2	1.11			4	1.71	3.18	5.82			4	4.24	2.92	10.32
	5	2.92	2.06	1.94			5	4.12	2.97	1.3			5	5.29	2.97	2.91
	6	2	1.41	3.43			6	4.53	5.16	2.27			6	8.06	3.56	3.43
	7	3.29	1.29	1.42			7	0.88	3.63	6.36			7	10.5	2.58	7.28
	8	1.83	1.48	0.56			8	2.51	5.94	2.06			8	14.58	5.89	3.56
	9	1.02	1.7	1.59			9	2.24	4.84	3.19			9	1.88	4.84	3.18
	10	0.43	2.07	3.17			10	2.01	4.14	6.45			10	4.19	4.84	8.22
	11	1.02	3.22	3.19			11	2.98	3.22	2.82			11	8.07	2.07	3.19
	12	3.99	5.04	2.82			12	2.5	5.04	1.95			12	6.65	1.61	5.63
	13	3.14	1.94	2.49			13	1.55	3.45	4.85			13	5.47	2.52	9.67
	14	2.86	2.28	3.78			14	1.75	3.88	2.51			14	3.47	8.62	7.52
	15	3.87	1.36	3.68			15	1.06	5.16	3.53			15	9.7	1.94	5.05
	16	0.99	1.52	5.18			16	2.69	4.8	4.04			16	4.2	5.16	4.85
	17	0.87	1.68	1.08			17	1.28	3.86	2.01			17	2.28	15.38	3.77
	18	2.5	4.2	1.18			18	1.92	1.81	3.34			18	3.22	4.88	4.58
	19	2.55	2.29	2.45			19	1.91	2.99	3.03			19	6.71	3.61	8.41
	20	2.96	0.9	2.69			20	2.87	2.8	3.16			20	4.7	6.95	5.29
	21	3.14	3.76	0.7			21	1.7	5.73	2.37			21	4.58	4.2	4.04
	22	2.85	5.37	2			22	2.86	3.74	4.13			22	8.14	6.64	5.02
	23	1.31	3.8	1.61			23	3.37	1.91	1.81			23	9.68	4.65	5.01
	24	0.52	2.6	0.98			24	3.14	2.75	4.54			24	4.79	7.64	9.81
	25	0.93	2.07	1.79			25	4.28	3.76	5.32			25	3.49	4.13	9.68
	26	2.26	1.27	1.61			26	2.9	2.53	3.21			26	4.53	1.88	4.34
	27	1.94	1.02	4.13			27	1.56	3.83	3.64			27	4.79	6.02	5.92
	28	1.08	3.43	2.7			28	3.48	3.74	5.04			28	4.2	7.65	7.35
	29	2.61	2.4	1.98			29	0.9	5.2	6.13			29	4.56	9.34	5.1
	30	1.07	2.53	7.76			30	0.71	7.3	2.69			30	3.24	2.6	8.48
	31	2.15	4.14	1.46			31	1.93	4.7	3.45			31	6.34	5.74	3.88
	32	7.52	3.5	4.23			32	1.45	2.28	1.18			32	4.48	7.45	3.88
	33	1.21	1.92	0.59			33	3.06	3.36	3			33	4.04	3.65	3.88
	34	0.68	4.06	0.98			34	3.07	3.69	3.46			34	2.97	2.35	6.34
	35	3.46	2.96	2.25			35	3.26	2.37	3.32			35	2.46	2.28	4.84
	36	1.99	3.22	3.03			36	6.38	3.23	2.35			36	7.79	5.04	5.55
	37	4.77	0.75	3.3			37	5.76	3.71	2.05			37	9.44	7.38	10.61
	38	1.88	1.69	4.49			38	2.66	2.12				38	2.6	3.55	5.57
	39	2.32	1.09	3.13			39	4.2	3.71				39	3.04	3.23	5.04
	40	2.34	3.04	1.91			40	2.27	2.29				40	10.72	5.57	6.13
	41	2.71	2.97	2.44			41	1.29	5.01				41	7.75	7.42	7.7
	42	0.65	1.17	1.89			42	2.87	3.22				42	5.25	5.57	13.42
	43	0.78	1.37	2.33			43	1.87	2.71				43	2.58	9.67	4.2
	44	1.03	4.52	2.01			44		4.88				44	8.44	7.73	4.08
	45	0.82	4.56	4.33			45		3.28				45	4.84	7.35	4.79
	46	1.74	5.94				46		3.04				46	2.92	1.61	5.95
	47	3.6	1.27				47		5.94				47	2.46	6.78	6.89
	48	1.38	1.43				48		2.23				48	3.68	4.88	4.33
	49	1.07	2.6				49		2.97				49	4.39	1.64
	50	0.74	4.9				50		4.52				50	3.22	3.04
	51	1.46	0.64				51		4.56				51	5.05	2.97
	52	1.51	1.82				52		5.97				52	10.37	5.48
	53	1.59					53		5.94				53	3.87	2.97
	54	1.39					54		2.58				54	3.87	2.26
	55	3.19					55		1.9				55	6.53	2.28
	56	5.84					56		3.64				56	5.51	8.96
	57	4.06					57		3.15				57	2.92	2.97
	58	2.42					58		7.59				58	3.19	3.87
	59	3					59		5.23				59	2.88	15.75
	60	5.32					60		4.02				60	17.54	2.6
	61	3.58					61		2.89				61	2.66	9.09
	62	2.37					62		3.57				62	3.43	9.44
	63	1.3					63		3.64				63	3.43	7.59
	64	0.88					64		8.26				64	11.63	7.85
	65	4.31											65	7.59	12.05
													66	5.47	11.03
													67	5.64	4.48
													68		1.82
													69		4.13
Figure 4B		mpgTr number			mpgTr length (in pixel)
	sample No.	control	trpml1	sample No.	control	trpml1
	1	26	26	1	14228.6	18781.6
	2	12	25	2	5433.09	16325.4
	3	31	28	3	14045.6	15293.8
	4	26	32	4	15504.7	17703.1
	5	31	29	5	15179.2	13004.5
	6	18	22	6	10355.5	13959.4
	7	26	27	7	12407.9	13883.2
	8	20	25	8	10175.9	14506.7
	9	25		9	9627.56
	10	25		10	13572.6
Figure 4D	sample No.	control	trpml1	alrm>trpmlJF01239	trpml1 +NAC
	1	126.98	133.63	123.83	118.47
	2	128.81	137.93	125.99	117.35
	3	130.34	136.85	124.23	116.7
	4	131.18	127.76	125.88	117.71
	5	129.35	126.55	136.82	118.86
	6	133.25	123.81	136.69	128.88
