# Supplementary material for: TrpML-mediated astrocyte microdomain Ca2+ transients regulate astrocyte–tracheal interactions
Source: eLife. 2020 Dec 7;9:e58952. doi: 10.7554/eLife.58952 (PMC7721441; doi:10.7554/eLife.58952)
Supplement: Figure 4—source data 2. [file elife-58952-fig4-data2.xlsx]

## Sheet: Sheet1
Figure 4-Source Data 4. Loss of TrpML leads to overgrowth of trachea and excessive reactive oxygen species (ROS) in larval CNS.
Figure 4A														Figure 4B		control		trpml1		control: tyramine treatment		DMSO				Tyramine
	retraction:		control	trpml1	extension:		control	trpml1	max. length:		control	trpml1			sample No.	extension (%)	retraction (%)	extension (%)	retraction (%)			(-)		(+)		(-)		(+)
		filopodium No.				filopodium No.				filopodia No.					1	44.3	55.7	52	48		Sample No.	extension (%)	retraction (%)	extension (%)	retraction (%)	extension (%)	retraction (%)	extension (%)	retraction (%)
		1	1.41	1		1	1.3	1.08		1	14.49	2.52			2	49	51	47.3	52.7		1	45.8	54.2	43.9	56.1	46.7	53.3	30.8	69.2
		2	2.84	1.36		2	2.48	1.81		2	6.65	3.43			3	54.3	45.7	48	52		2	60.9	39.1	38.9	61.1	46.7	53.3	36.6	63.4
		3	0.77	0.97		3	4.04	1.33		3	3.04	3.37			4	53.7	46.3	58.8	41.2		3	45.5	54.5	48.3	51.7	37.1	62.9	36.8	63.2
		4	0.74	2.58		4	1.52	0.66		4	3.04	1.94			5	54.3	45.7	57.9	42.1		4	43.8	56.3	54.8	45.2	45.8	54.2	31.8	68.2
		5	0.93	2.89		5	1.71	3.91		5	3.04	8.22			6	38.2	61.8	47.1	52.9		5	52.1	47.9	30.5	69.5	47.1	52.9	30	70
		6	1.75	4.6		6	4.18	2.97		6	7.1	7.78									6	35.7	64.3	44.4	55.6	33.8	66.2	36	64
		7	3.29	2.34		7	3.07	2.56		7	5.57	4.84
		8	0.26	0.55		8	3.22	7.1		8	5.55	4.88
		9	1.64	1.59		9	1.77	2.84		9	2.74	4.08
		10	1.3	1.76		10	0.27	5.88		10	2.6	4.76
		11	4.98	1.2		11	1.4	1.62		11	4.56	2.77		Figure 4C		LON branch		LON filopodia
		12	1.26	0.49		12	1.02	1.97		12	2.28	7.08			sample No.	control	trpml1	control	trpml1
		13	1.46	1.38		13	5.76	5.1		13	10.24	11.77			1	0	2	0	5
		14	1.78	3.37		14	1.26	4.48		14	1.61	7.14			2	1	1	1	3
		15	0.59	2.6		15	3.55	2.53		15	2.66	2.35			3	0	1	1	1
		16	1.44	3.08		16	0.49	3.65		16	4.04	6.52			4	1	1	0	4
		17	1.05	0.64		17	1.81	5.92		17	4.24	7.93			5	0	1	1	1
		18	0.62	7.54		18	1.03	6.14		18	3.49	4.62			6	0	2	3	4
		19	0.94	2.26		19	5.84	2.43		19	2.9	7.45			7	1	1	6	12
		20	1.5	4.2		20	3.48	5.43		20	1.96	2.26			8	1	2	4	3
		21	0.42	2.11		21	4.85	2.23		21	4.2	7.45			9	1	2	5	2
		22	1.69	1.73		22	3.87	3.25		22	2.07	2.04			10	1	1	3	0
		23	0.24	0.86		23	1.64	1.59		23	2.97	6.86			11	2	1	0	4
		24	2.98	2.18		24	1.08	1.73		24	3.49	16.02			12	0	1	2	13
		25	8.38	1.09		25	3.24	3.46		25	5.25	9.04			13	0	0	2	3
		26	1.14	2.09		26	6.42	0.17		26	3.18	4.79			14	1	0	1	4
		27	2.04	0.85		27	3.22	5.16		27	1.33	7.8			15	1	0	6	2
		28	1.52	1.28		28	0.95	6.1		28	5.49	4.79			16	0	1	0	6
		29	0.56	1.23		29	0.54	1.18		29	5.16	4.9			17	0	1	1	1
		30	0.64	2.39		30	1.28	2.27		30	2.92	5.5			18	1	2	3	9
		31	0.66	0.41		31	2.84	3.86		31	2.46	4.79			19	0	1	1	2
		32	4.26	2.27		32	1.28	2.74		32	1.29	5.16			20	0	1	2	2
		33	1.55	2.66		33	3.06	3.89		33	3.76	2.28
		34	2.24	3.11		34	2.19	1.61		34	1.61	2.35		Figure 4D
		35	2.37	3.3		35	1.18	3.28		35	0.97	5.93			sample No.	control	trpml1	alrm>trpmlJF01239	trpml1 +NAC
		36	1.1	0.96		36	0.97	0.54		36	3.23	3.47			1	2	9.4	6.1	3
		37	1.3	1.6		37	4.5	5.76		37	3.77	10.72			2	3.2	9.7	7.1	3.7
		38	1.01	1.02		38	0.64	4.82		38	3.61	2.04			3	0.7	7.4	5.3	2.4
		39	1.95	2.75		39	4.73	4.04		39	1.64	6.14			4	1.9	6.1	4.9	3.6
		40	0.66	1.96		40	1.11	1.7		40	7.75	5.95			5	2.5	8.1	9.9	3.5
		41	2.74	6.46		41	1.61	3.89		41	3.87	9.1			6	2	6.2	7.5	3.3
		42	0.22	0.83		42	0.62	0.98		42	2.88	10.78
		43	1.81	1.94		43	3.42	2.96		43	2.92	18
		44	1.5	2.58		44	3.49	2.58		44	1.29	3.24
		45	0.33	3.16		45	1.76	1.87		45	2.92	3.9
		46	3.61	1.42		46	3.23	1.18		46	3.56	3.61
		47	0.67	0.55		47	0.18	6.78		47	7.53	11.44
		48	1.24	1.52		48	2.8	3.95		48	2.28	3.88
		49	2.69	2.29		49	2.43	5.22		49	2.6	5.05
		50	2.82	3.13		50	3.63	6.2		50	2.97	3.68
		51	3.76	1.89		51	2.72	7.12		51	4.39	6.26
		52	3.75	5.2		52	2.07	6.66		52	5.1	6.78
		53	4.1	6.44		53	3.15	3.75		53	2.92	6.35
		54	1.96	1.29		54	1.83	3.11		54	2.9	10.64
		55	1.19	2.82		55	1.88	3.48		55	4.58	2.16
		56	2.77	2.28		56	2.27	1.51		56	1.96	4.2
		57	2.71	2.16		57	4.56	3.94		57	6.62	7.5
		58	1.36	2.33		58	1.95	3.32		58	6.02	7.9
		59	3.96	1.51		59	2.1	2.75		59	5.2	4.49
		60	1.9	2.28		60	1.97	5.71		60	2.9	3.56
		61	1.22	3.39		61	3.12	2.32		61	1.64	4.21
		62	1.25	3.22		62	0.62			62	6.65	3.94
		63	0.81			63	2.32			63	3.04	4.39
		64	2.1			64	1.81			64	7.28	8.65
		65	2.7			65	1.44			65	5.53	5.05
		66	1.3			66	1.61			66	4.84	3.18
		67	2.35			67	2.84			67	9.62	2.52
		68	2.48			68	2.24			68	5.49	5.1
		69	1.14			69	3.22			69	3.87	7.74
		70	1.13			70	2.27			70	6.46	5.49
		71	1.21			71	2.57			71	7.31	7.04
		72	1.63			72	3.54			72	5.57	2.77
		73	2.62			73	2.85			73	5.92
		74	2.56			74	2.43			74	6.26
		75	2.3			75	1.67			75	3.32
		76	0.52			76	3.18			76	3.56
		77	2.82			77	2.99			77	10.02
		78	1.25			78	3.15			78	5.21
		79	2.14			79	3.63			79	2.07
		80	2.29			80	2.7			80	3.92
		81	2.31			81	0.95			81	2.28
		82	4.9			82	4.58			82	1.64
		83	3			83	2.57			83	5.41
		84	0.46			84	2.59			84	5.05
		85	1.43			85	6			85	5.2
		86	2.44			86	1.74			86	3.9
		87	0.88			87	2.79			87	3.43
		88	1.57			88	2.57			88	5.81
		89	1.92			89	2.04			89	2.35
		90	2.43			90	2.52			90	6.89
		91	0.64			91	1.57			91	3.43
		92	2.61			92	2.17			92	3.88
		93	1.31			93	4.15			93	4.88
		94	0.69			94	5.14			94	4.56
		95	0.33			95	1.76			95	5.64
		96	0.7			96	2.04			96	4.76
		97	1.29			97	5.88			97	4.79
		98	1.74			98	0.62			98	4.62
		99	0.87			99	2.66			99	5.81
		100	1.49			100	1.24			100	4.76
		101	0.76			101	1.06			101	6.78
		102	0.98			102	4.58			102	2.07
		103	0.72			103	2.03			103	3.04
		104	2.72			104	2.78			104	12.04
		105	2.41			105	3.09			105	13.52
		106	2.62			106	3.1			106	4.2
		107	0.75			107	3.76			107	4.33
		108	3.45			108	2.08			108	6.96
		109	1.84			109	2.18			109	6.95
		110	1.5			110	1.98			110	6.78
		111	1.72			111	2.91			111	3.37
		112	1.16			112	4.77			112	2.9
		113	1.34			113	1.09			113	7.21
		114	3.23			114	4.24			114	5.25
		115	2.62			115	0.08			115	9.62
		116	3.56			116	1.54			116	6.16
		117	2.98			117	1.72			117	3.29
		118	1.59			118	1.52			118	2.46
		119	2.79			119	1.07			119	2.33
		120	3.9			120	2.59			120	5.2
		121	3.79			121	4.04			121	2.35
		122	0.88			122	3.41			122	5.17
		123	3.67			123	5.41			123	3.99
		124	4.6			124	1.95			124	3.47
		125	1.54			125	4.12			125	5.2
		126	2.21			126	2.71			126	2.52
		127	3.37			127	4.54			127	3.43
		128	1.29			128	3.26			128	3.43
		129	2.24			129	0.62			129	8.44
		130	0.04							130	2.76
										131	7.61
										132	4.84
										133	4.65
										134	5.32
										135	1.74
										136	2.28
										137	3.88
										138	12.95
										139	2.6
										140	4.58
										141	1.33
										142	1.74
										143	5.25
										144	4.33
										145	5.2
										146	3.24
										147	6.65
										148	3.04
										149	6.73
										150	6.43
										151	4.62
										152	4.34
										153	4.53
										154	7.53
										155	5.2
										156	1.33
