# Supplementary material for: TrpML-mediated astrocyte microdomain Ca2+ transients regulate astrocyte–tracheal interactions
Source: eLife. 2020 Dec 7;9:e58952. doi: 10.7554/eLife.58952 (PMC7721441; doi:10.7554/eLife.58952)
Supplement: Source data 1. — Manual method and AQuA identify comparable amount of microdomain Ca2+ transients. [file elife-58952-data1.xlsx]

## Sheet: Sheet1
Eyeballing VS AQuA (microdomain Ca2+ frequency)
Sample No.	Eyeballing	AQuA
1	5	9.5
2	24	31
3	15.7	14
4	12	15.7
5	19.3	17.5
6	24	30.8
